# Supplementary material for: Defect engineering in carbon skeletons toward precise edge-nitrogen doping for efficient electrochemical energy storage
Source: Royal Society of Chemistry journal article supplement (doi:10.1039/d5ta08565a), 2026-01-01
Supplement: d5ta08565a1.pdf [file d5ta08565a1.pdf]

## Defect Engineering in Carbon Skeletons toward Precise Edge-Nitrogen Doping for Efficient Electrochemical Energy Storage

Yi Yang\*, Qiu-xiang Chen, Xing-yue Huang, Huan Liu, Tian Xia, You-bing Li, Jin-yong Mo\*

College of Materials Science and Engineering, Chongqing University of Technology, Chongqing,  
People's Republic of China

\*E-mail: yiyang@cqut.edu.cn; jinyong@cqut.edu.cn

### Calculation of capacitive contribution

The potential-dependent current of an electrode typically consists of two components: a capacitive contribution and a diffusion-controlled one. The capacitive response is rapid and originates from electric double-layer charging and surface-confined Faradaic reactions occurring within a shallow region of the electrode. In contrast, the diffusion-controlled contribution stems from bulk Faradaic processes governed by the diffusion of electroactive species inside the electrode. To further clarify the charge-storage kinetics, the power-law relationship and Dunn's method are used.

The power-law relationship: The current response from a cyclic voltammogram obeys the relationship of Equation S1

$$i = av^b \quad (\text{S1})$$

Where  $a$  and  $b$  are adjustable parameters. For the ideal capacitive behavior, the current response is proportional to the scan rate ( $b=1$ ). The current response of diffusion-limited process is proportional to the square root of the scan rate ( $b=0.5$ ). The adjustable parameters of  $a$  and  $b$  can be calculated using the linear fitting of  $\lg i$  and  $\lg v$  with the following Equation S2.

$$\lg i = \lg a + b \lg v \quad (\text{S2})$$

Dunn's method: At a given potential, the total current response ( $i$ ) can be quantitatively separated into these two components using the following expression:

$$i = k_1 v + k_2 v^{1/2} \quad (\text{S3})$$

Where  $k_1 v$  originates from the capacitive contribution,  $k_2 v^{1/2}$  originates from the

diffusion-limited Faradaic processes. By rearranging the above equation into the following Equation S4, the two components can be effectively decoupled based on the linear relationship between  $i/v^{1/2}$  and  $v^{1/2}$ .

$$i/v^{1/2} = k_1 v^{1/2} + k_2 \quad (\text{S4})$$

From the slope and intercept of this linear fit, the constants  $k_1$  and  $k_2$  can be determined, enabling the quantitative estimation of the current contributions from capacitive and diffusion-controlled processes.

### Supplementary tables and Figures

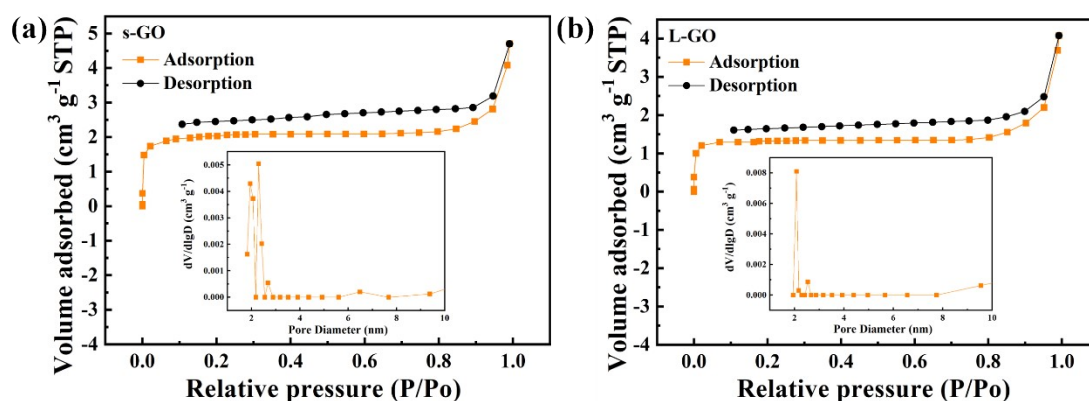

**Fig. S1** Nitrogen adsorption-desorption isotherm of (a) s-GO and (b) L-GO. The inset shows the corresponding pore size distribution (BJH)

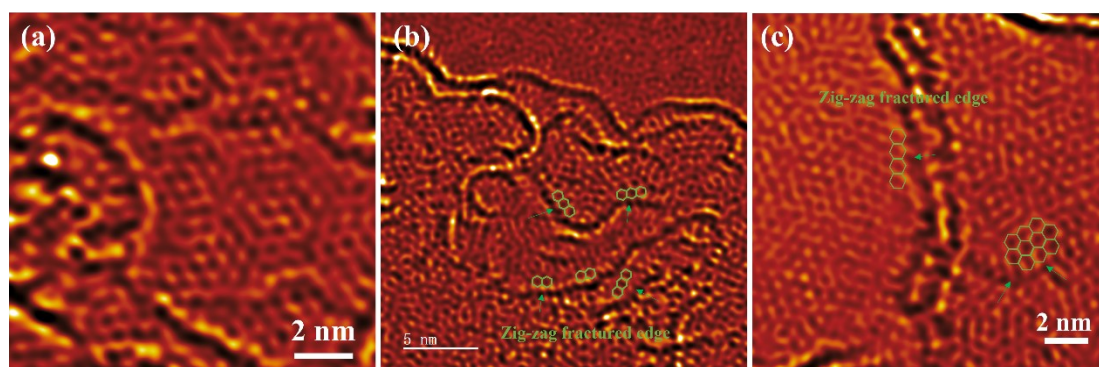

**Fig. S2** AC-TEM images of s-GO carbon frameworks. (a) A clear version without annotations of the image shown in Fig. 2f. (b, c) AC-TEM images of different regions. The structure exhibited numerous crack boundaries and clearly defined zigzag carbon edges after ultrasonic treatment.

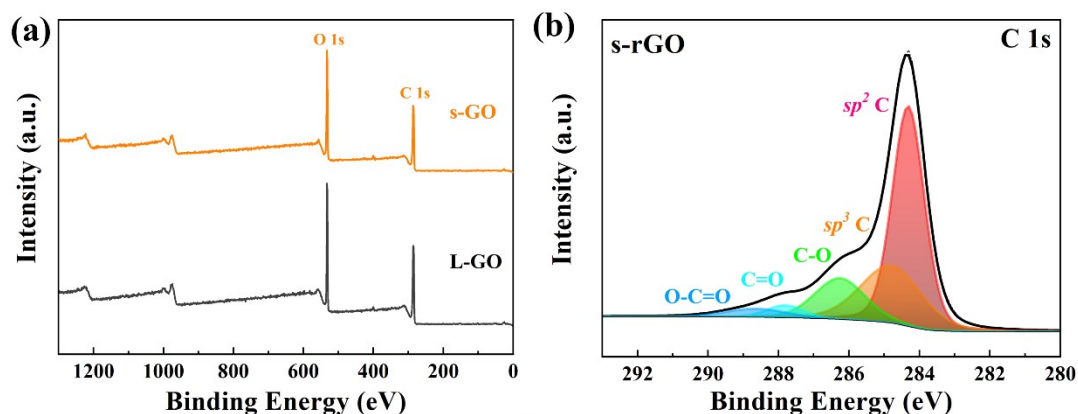

**Fig. S3** (a) Full XPS spectra of s-GO and L-GO, displaying prominent peaks for oxygen (O 1s) and carbon (C 1s). (b) High-resolution XPS C 1s spectra of s-rGO.

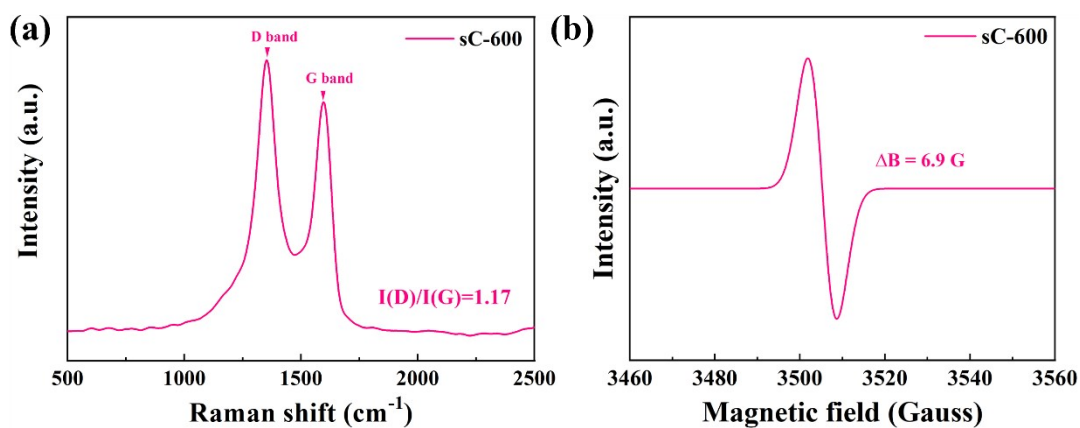

**Fig. S4** (a) Raman and (b) EPR spectra of sC-600.

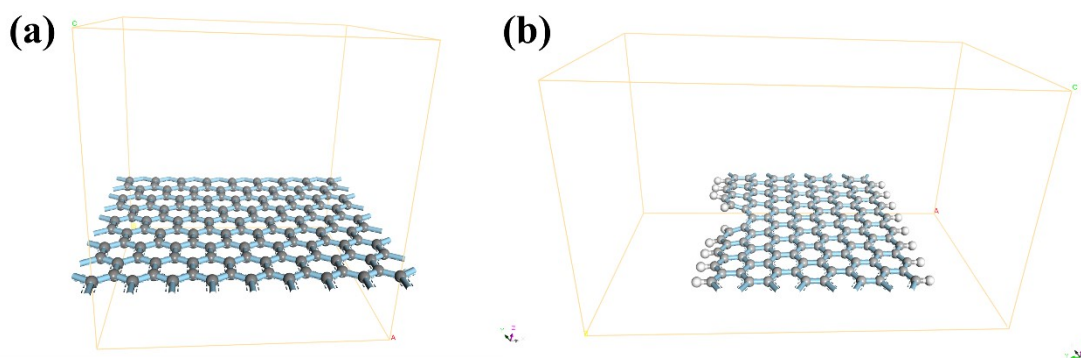

**Fig. S5** The prototypical carbon skeleton models based on the graphene structure. (a) Boundary-free monolayer graphene. (b) Zigzag graphene nanoribbon (GNR) consisting of eight carbon atom rows terminated by hydrogen atoms, containing a carbon vacancy located at a zigzag edge.

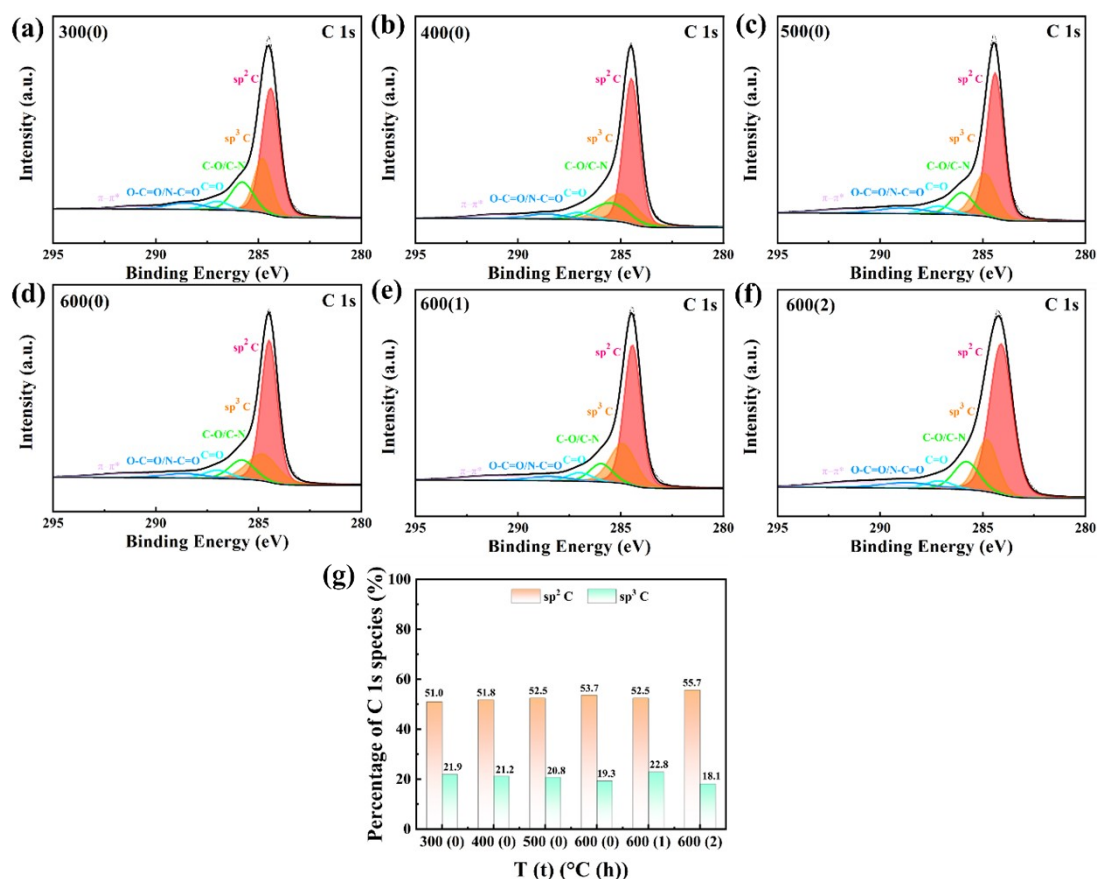

**Fig. S6** High-resolution XPS C 1s spectra of s-rGO treated at (a) 300 °C, (b) 400 °C, (c) 500 °C, (d) 600 °C, (e) 600 °C for 1 h and (f) 600 °C for 2 h (sN-C-600). (g) Percentage of  $sp^2$  C and  $sp^3$  C in above samples.

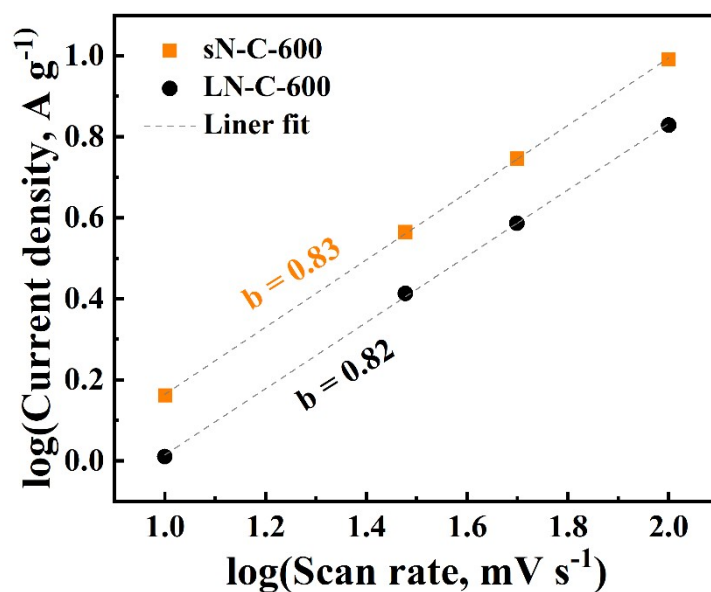

**Fig. S7** Logarithmic plots of cathodic peak current density versus scan rate, and the corresponding b-values for sN-C-600 and LN-C-600 determined via the power-law relationship.

**Table S1** Pore parameters of s-GO and L-GO.

| Samples | Specific surface area                  | Average pore diameter | Pore volume                        |
|---------|----------------------------------------|-----------------------|------------------------------------|
|         | (BET, m <sup>2</sup> g <sup>-1</sup> ) | (BJH, nm)             | (cm <sup>3</sup> g <sup>-1</sup> ) |
| s-GO    | 7.75                                   | 13.01                 | 0.0071                             |
| L-GO    | 5.25                                   | 20.45                 | 0.0060                             |

**Table S2** Pore size distribution of s-GO and L-GO.

| Pore Classification | Pore size<br>distribution<br>(nm) | Specific surface area<br>(m <sup>2</sup> g <sup>-1</sup> ) |       |
|---------------------|-----------------------------------|------------------------------------------------------------|-------|
|                     |                                   | s-GO                                                       | L-GO  |
|                     |                                   |                                                            |       |
| Micropores (T-plot) | 0.35-2                            | 7.670                                                      | 5.204 |
| Mesopores (BJH)     | 2-10                              | 0.936                                                      | 0.375 |
|                     | 10-50                             | 0.453                                                      | 0.492 |
| Macropores (BJH)    | 50-196                            | 0.026                                                      | 0.013 |

**Table S3** Atomic percentages (at. %) of C and O in s-GO and L-GO, with proportions of different C 1s species.

| □Samples | C (at. %) | O (at. %) | C/O  | C 1s species (%)  |                   |      |     |       |
|----------|-----------|-----------|------|-------------------|-------------------|------|-----|-------|
|          |           |           |      | sp <sup>2</sup> C | sp <sup>3</sup> C | C-O  | C=O | O-C=O |
| s-GO     | 67.4      | 32.6      | 2.07 | 29.2              | 17.6              | 40.7 | 7.9 | 4.6   |
| L-GO     | 67.6      | 32.4      | 2.09 | 35.4              | 12.9              | 40.1 | 7.6 | 4.0   |

**Table S4** Atomic percentages (at. %) of C and O in s-rGO, with proportions of different C 1s species.

| □ Samples    | C (at. %) | O (at. %) | C/O         | C 1s species (%)  |                   |      |     |       |
|--------------|-----------|-----------|-------------|-------------------|-------------------|------|-----|-------|
|              |           |           |             | sp <sup>2</sup> C | sp <sup>3</sup> C | C-O  | C=O | O-C=O |
| <b>s-rGO</b> | 81.7      | 18.3      | <b>4.46</b> | <b>51.6</b>       | 25.9              | 15.2 | 3.4 | 3.9   |

**Table S5** Proportions of different N 1s configurations in sN-C-Ts and LN-C-Ts (500-900).

| Samples         | N Configurations (%) |      |             |      |          |
|-----------------|----------------------|------|-------------|------|----------|
|                 | N-6                  | N-5  | Edge-N      | N-Q  | Oxidic-N |
| <b>sN-C-500</b> | 40.7                 | 30.4 | <b>71.1</b> | 16.8 | 12.1     |
| <b>LN-C-500</b> | 44.2                 | 27.4 | <b>71.6</b> | 14.2 | 14.2     |
| <b>sN-C-600</b> | 47.3                 | 24.5 | <b>71.8</b> | 18.7 | 9.5      |
| <b>LN-C-600</b> | 29.2                 | 33.6 | <b>62.8</b> | 27.5 | 9.6      |
| <b>sN-C-700</b> | 35.9                 | 25.8 | <b>61.7</b> | 19.5 | 18.8     |
| <b>LN-C-700</b> | 18.0                 | 39.7 | <b>57.7</b> | 36.4 | 5.9      |
| <b>sN-C-800</b> | 28.5                 | 28.1 | <b>56.6</b> | 30.0 | 13.3     |
| <b>LN-C-800</b> | 21.7                 | 29.3 | <b>51</b>   | 37.3 | 11.7     |
| <b>sN-C-900</b> | 33.3                 | 22.9 | <b>56.2</b> | 31.2 | 12.6     |
| <b>LN-C-900</b> | 25.1                 | 25.0 | <b>50.1</b> | 36.4 | 13.5     |

**Table S6** Atomic percentages (at. %) of C, O and N in sN-C-Ts (500-900).

| Samples         | C (at. %) | O (at. %) | N (at. %)  | N/C (%)    |
|-----------------|-----------|-----------|------------|------------|
| <b>sN-C-500</b> | 89.2      | 5.2       | <b>5.6</b> | <b>6.3</b> |
| <b>sN-C-600</b> | 89.0      | 4.7       | <b>6.3</b> | <b>7.1</b> |
| <b>sN-C-700</b> | 92.7      | 3.5       | <b>3.8</b> | <b>4.1</b> |
| <b>sN-C-800</b> | 93.2      | 3.3       | <b>3.5</b> | <b>3.8</b> |

|                 |             |            |            |            |
|-----------------|-------------|------------|------------|------------|
| <b>sN-C-900</b> | <b>95.2</b> | <b>2.5</b> | <b>2.3</b> | <b>2.4</b> |
|-----------------|-------------|------------|------------|------------|

**Table S7** Relative proportions of N species (including N-6, N-5, N-Q and Oxidic-N) and  $\pi^*/\sigma^*$  ratios for the edge and basal plane regions of sN-C-600.

|                           | $\pi^*$ States (%) |             |        |             |             | $\pi^*/\sigma^*$ |
|---------------------------|--------------------|-------------|--------|-------------|-------------|------------------|
|                           | N-6                | N-5         | Edge-N | N-Q         | Oxidic-N    |                  |
| <b>sN-C-600: Edge</b>     | <b>39.0</b>        | <b>11.3</b> | 50.3   | <b>16.0</b> | <b>33.7</b> | <b>4.1</b>       |
| <b>sN-C-600: In-plane</b> | <b>7.5</b>         | <b>23.2</b> | 30.7   | <b>11.1</b> | <b>58.2</b> | <b>0.5</b>       |

**Table S8** Atomic percentages (at. %) of C, O and N, and relative proportions of nitrogen configuration (including N-6, N-5, N-Q and Oxidic-N) in the samples of s-rGO treated at 300 °C, 400 °C, 500 °C, 600 °C, 600 °C for 1 h and 600 °C for 2 h (sN-C-600).

| T (t)<br>/°C (h) | C (at. %) | O (at. %) | N (at. %) | N/C         | N Configuration (%) |      |             |      |          | N-6/<br>N-5   |
|------------------|-----------|-----------|-----------|-------------|---------------------|------|-------------|------|----------|---------------|
|                  |           |           |           |             | N-6                 | N-5  | Edge-N      | N-Q  | Oxidic-N |               |
| <b>300 (0)</b>   | 87.4      | 9.6       | 3.0       | <b>3.4%</b> | 35.6                | 37.7 | <b>73.3</b> | 14   | 12.8     | <b>94.4%</b>  |
| <b>400 (0)</b>   | 87.8      | 9.0       | 3.2       | <b>3.6%</b> | 44.2                | 29.6 | <b>73.8</b> | 14.6 | 11.7     | <b>149.3%</b> |
| <b>500 (0)</b>   | 89.6      | 6.8       | 3.6       | <b>4.0%</b> | 45.0                | 26.9 | <b>71.9</b> | 14   | 14.1     | <b>167.3%</b> |
| <b>600 (0)</b>   | 89.7      | 6.3       | 4.0       | <b>4.4%</b> | 46.1                | 25.3 | <b>71.4</b> | 14.3 | 14.2     | <b>182.2%</b> |
| <b>600 (1)</b>   | 89.4      | 5.7       | 4.9       | <b>5.5%</b> | 48.6                | 25.8 | <b>74.4</b> | 12.6 | 12.9     | <b>188.4%</b> |
| <b>600 (2)</b>   | 89.0      | 4.7       | 6.3       | <b>7.1%</b> | 47.3                | 24.5 | <b>71.8</b> | 18.7 | 9.5      | <b>193.1%</b> |

**Table S9** relative proportions of C 1s species (including sp<sup>2</sup> C, sp<sup>3</sup> C, C-O/C-N, C=O, O-C=O/N-C=O and  $\pi$ - $\pi^*$ ) in the samples of s-rGO treated at 300 °C, 400 °C, 500 °C, 600 °C, 600 °C for 1 h and 600 °C for 2 h (sN-C-600).

| Samples       | C 1s Species (%)  |                   |         |      |                 |                 |
|---------------|-------------------|-------------------|---------|------|-----------------|-----------------|
|               | sp <sup>2</sup> C | sp <sup>3</sup> C | C-O/C-N | C=O  | O-C=O/<br>N-C=O | $\pi$ - $\pi^*$ |
| <b>300(0)</b> | <b>51.0%</b>      | <b>21.9%</b>      | 14.5%   | 4.6% | 5.5%            | 2.5%            |
| <b>400(0)</b> | <b>51.8%</b>      | <b>21.2%</b>      | 14.4%   | 4.2% | 4.3%            | 4.1%            |
| <b>500(0)</b> | <b>52.5%</b>      | <b>20.8%</b>      | 10.8%   | 4.7% | 5.9%            | 5.3%            |
| <b>600(0)</b> | <b>53.7%</b>      | <b>19.3%</b>      | 11.0%   | 4.8% | 4.3%            | 6.8%            |
| <b>600(1)</b> | <b>52.5%</b>      | <b>22.8%</b>      | 9.1%    | 4.5% | 4.0%            | 7.1%            |
| <b>600(2)</b> | <b>55.7%</b>      | <b>18.1%</b>      | 11.4%   | 3.4% | 4.7%            | 6.7%            |
